# Supplementary material for: A facile solution processible self-rectifying and sub-1 V operating memristor via oxygen vacancy gradient within a TiO2 single layer
Source: Royal Society of Chemistry journal article supplement (doi:10.1039/d4tc00227j), 2024-01-01
Supplement: d4tc00227j1.pdf [file d4tc00227j1.pdf]

## Supporting Information for

# **A facile solution processable self-rectifying and sub-1 V operating memristor via oxygen vacancy gradient within TiO<sub>2</sub> single layer**

*Min Ho Park<sup>a,b</sup>, Jun Hyung Jeong<sup>a,b</sup>, Wonsik Kim<sup>c</sup>, Soohyung Park<sup>c,d</sup>, Byeong Min Lim<sup>a,b</sup>,  
Hong-Sub Lee<sup>a,b</sup> and Seong Jun Kang<sup>\*,a,b</sup>*

<sup>a</sup> Department of Advanced Materials Engineering for Information and Electronics, Kyung Hee University, Yongin, 17104, Republic of Korea

<sup>b</sup> Integrated Education Program for Frontier Materials (BK21 Four), Kyung Hee University, Yongin, 17104, Republic of Korea

<sup>c</sup> Advanced Analysis Center, Korea Institute of Science and Technology, 5 Hwarang-ro 14-gil, Seongbuk-gu, Seoul 02792, Republic of Korea

<sup>d</sup> Division of Nano & Information Technology, KIST School, University of Science and Technology (UST), Seoul 02792, Republic of Korea

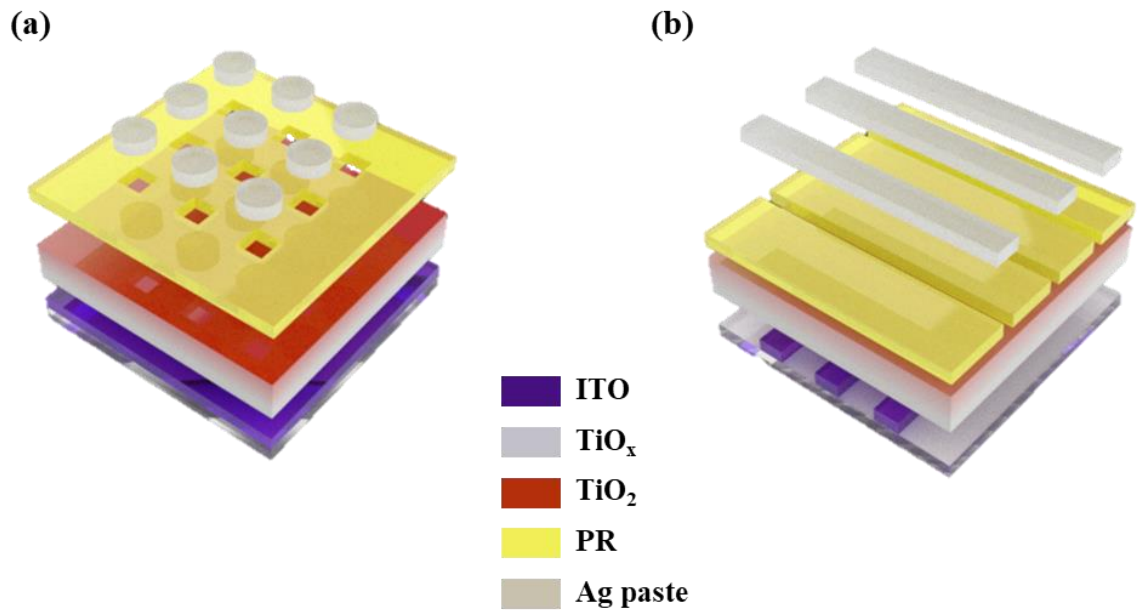

**Fig. S1** Schematic structure of the a-TiO<sub>2</sub> based memristor. (a) Dot type device. (b) Crossbar type device.

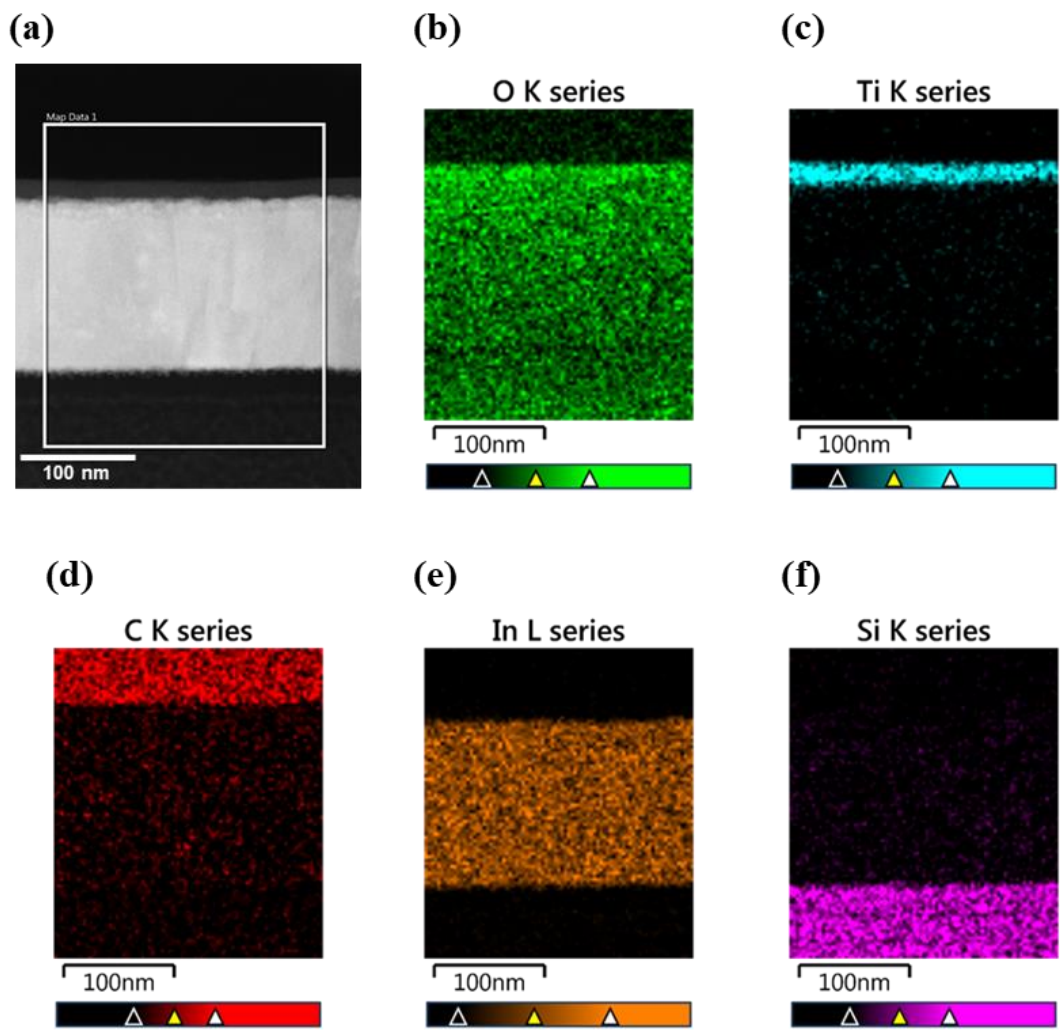

**Fig. S2** (a) HR-TEM image of a-TiO<sub>2</sub> on the ITO substrate with 100 nm scale bar. (b-f) EDS mapping images of various elements (O, Ti, C, In, Si) in the a-TiO<sub>2</sub> film on the ITO substrate.

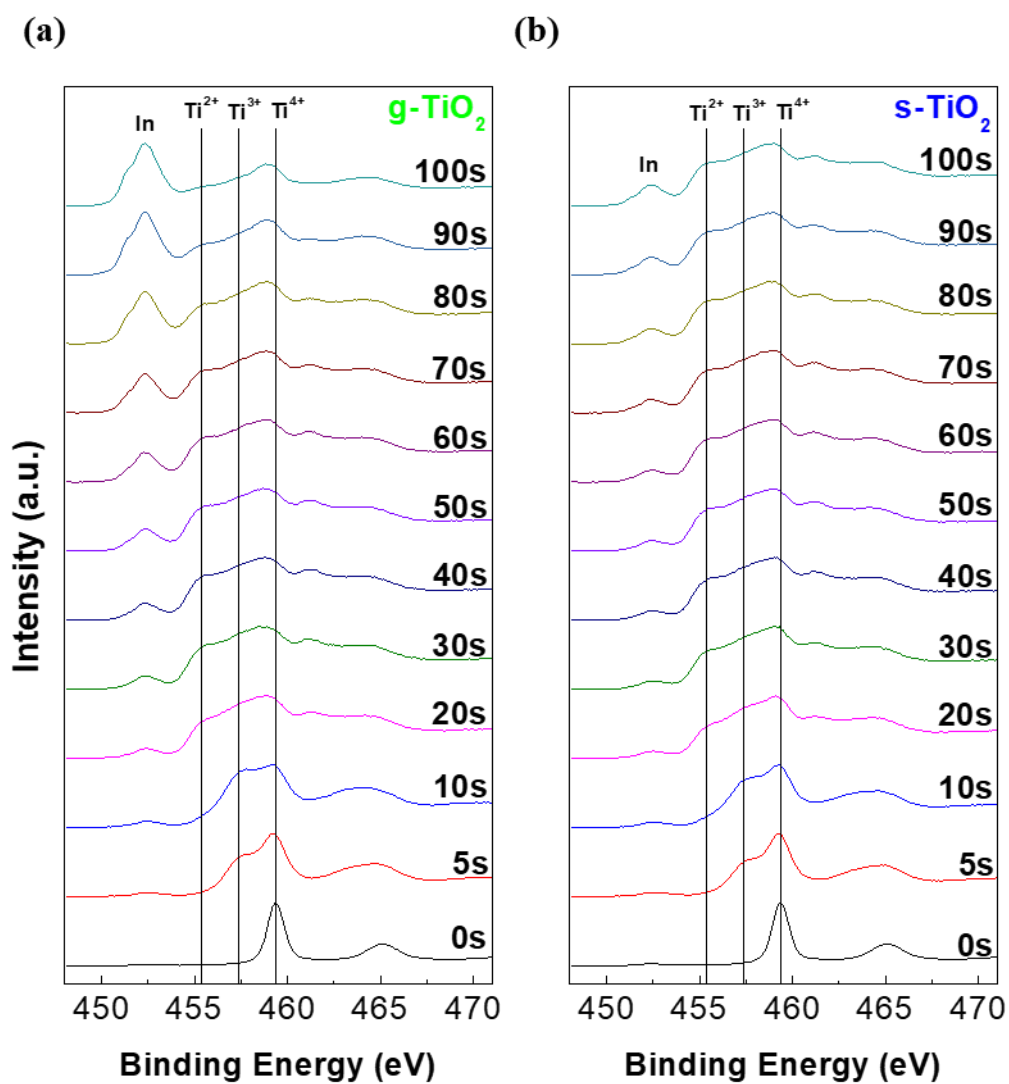

**Fig. S3** XPS depth profile for Ti 2p (a) in g-TiO<sub>2</sub> film and (b) in s-TiO<sub>2</sub> film as the functions of Ar<sup>+</sup> sputtering time.

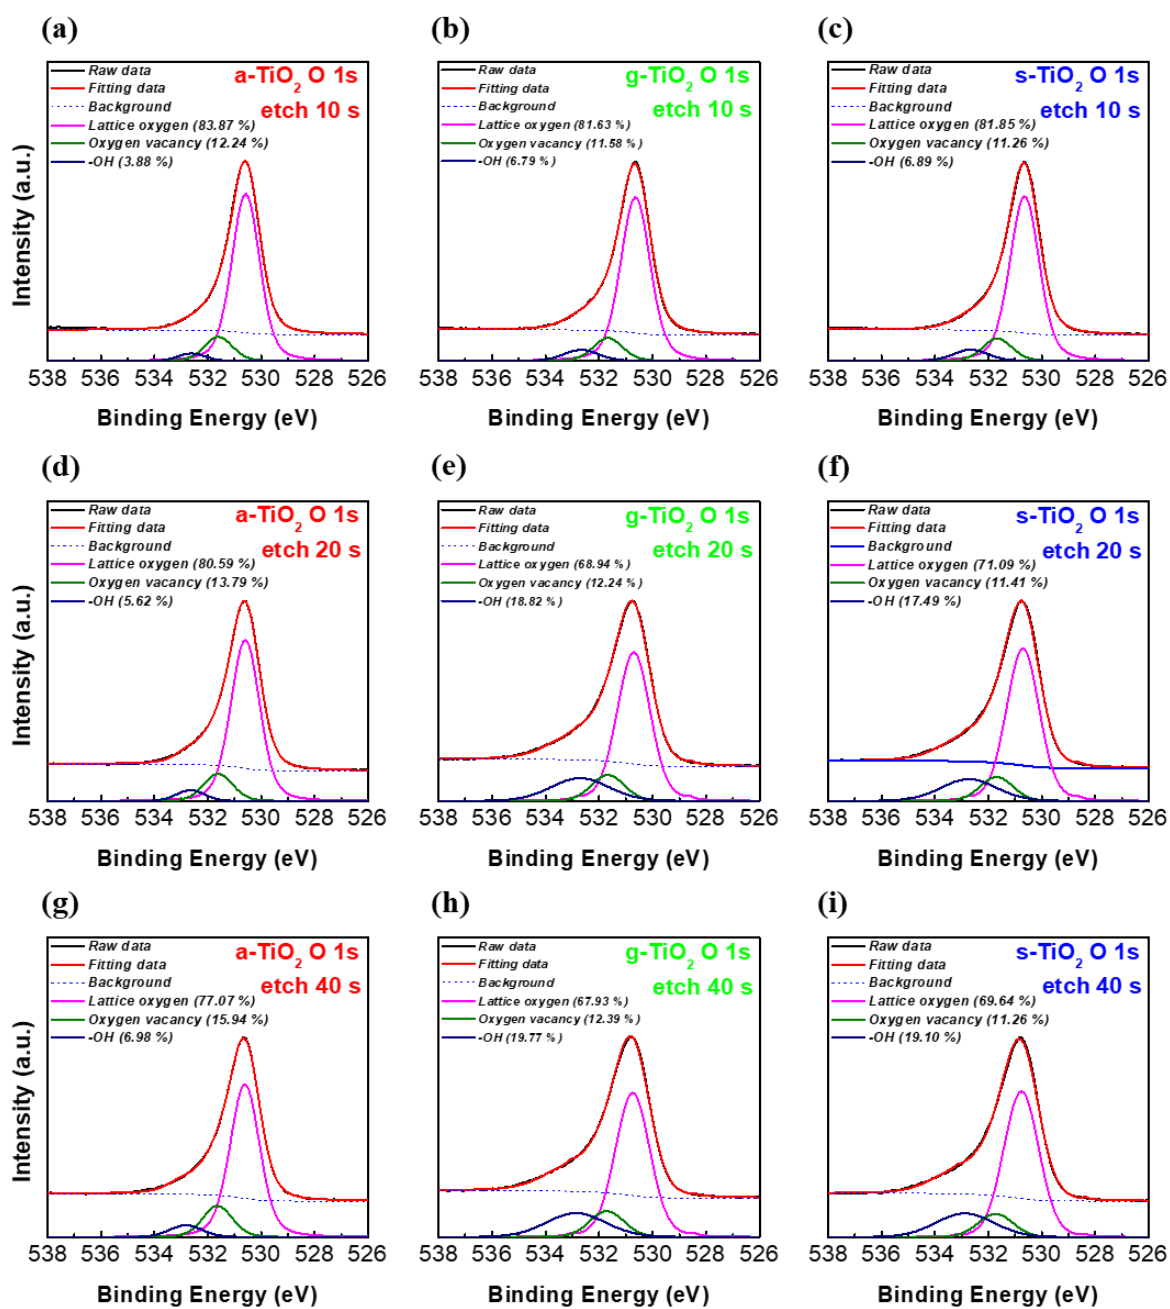

**Fig. S4** XPS spectra of O 1s of (a,d,g) a-TiO<sub>2</sub>,(b,e,h) g-TiO<sub>2</sub> and (c,f,i) s-TiO<sub>2</sub> films under different etching conditions.

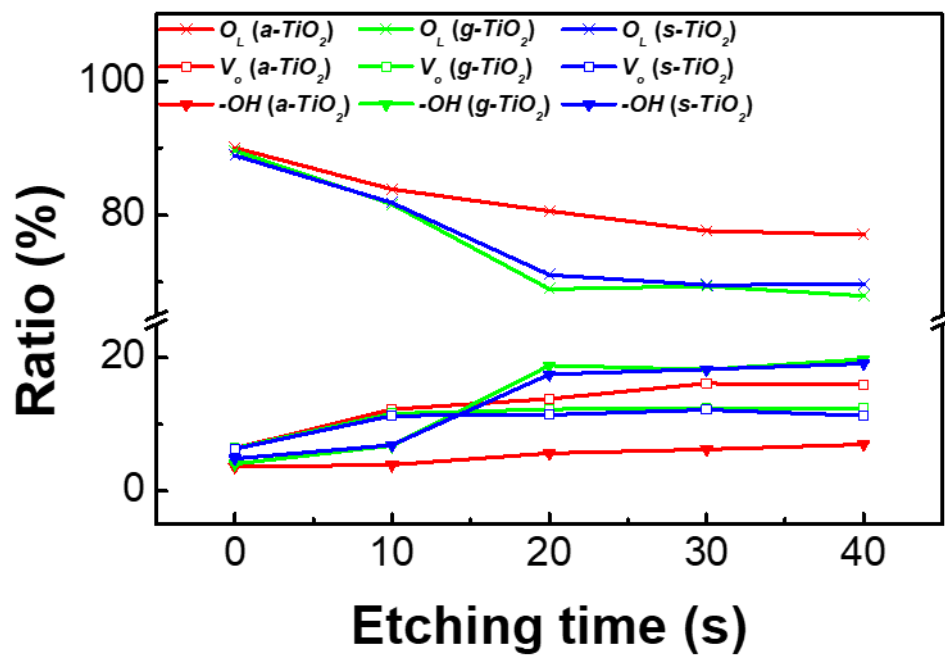

**Fig. S5** Summarized ratio of deconvolution area of a-TiO<sub>2</sub>, g-TiO<sub>2</sub> and s-TiO<sub>2</sub> films XPS O 1s spectra.

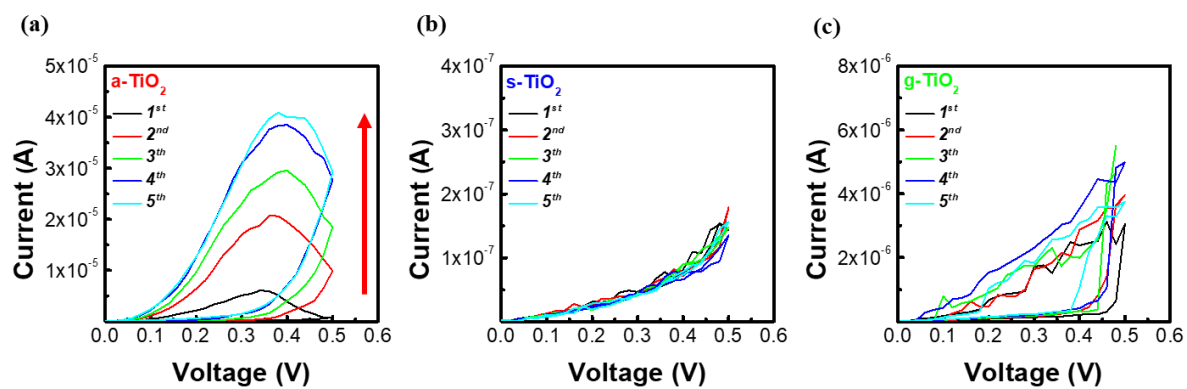

**Fig. S6**  $I$ - $V$  curves of memristors across 5 cycles, where positive voltage (0 V→0.5 V→0V) were applied.

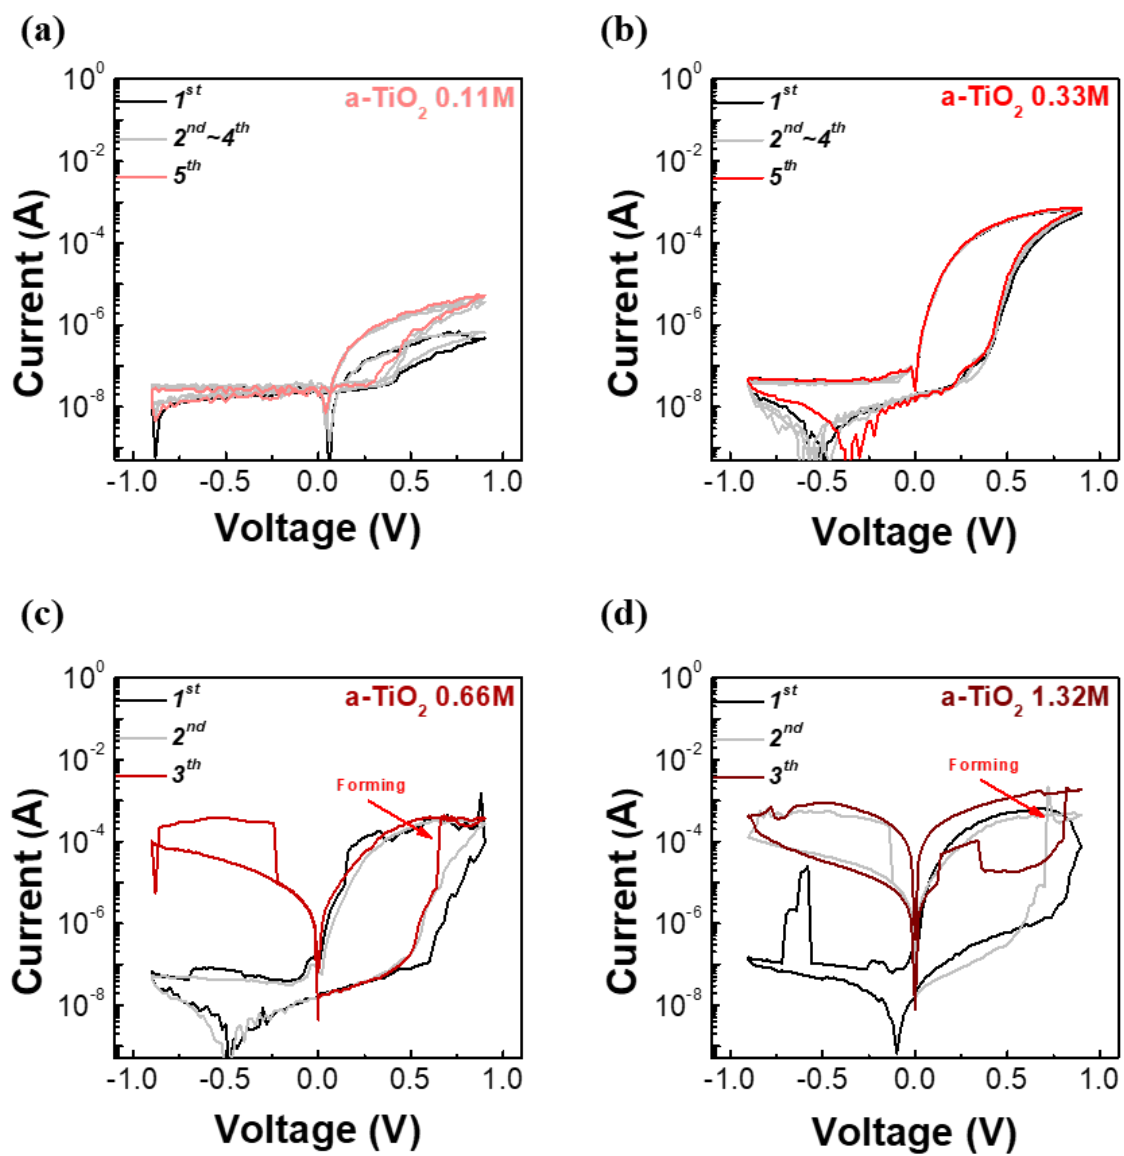

Fig. S7  $I$ - $V$  curves of  $a\text{-TiO}_2$  based dot type memristors using various concentrations of solution.



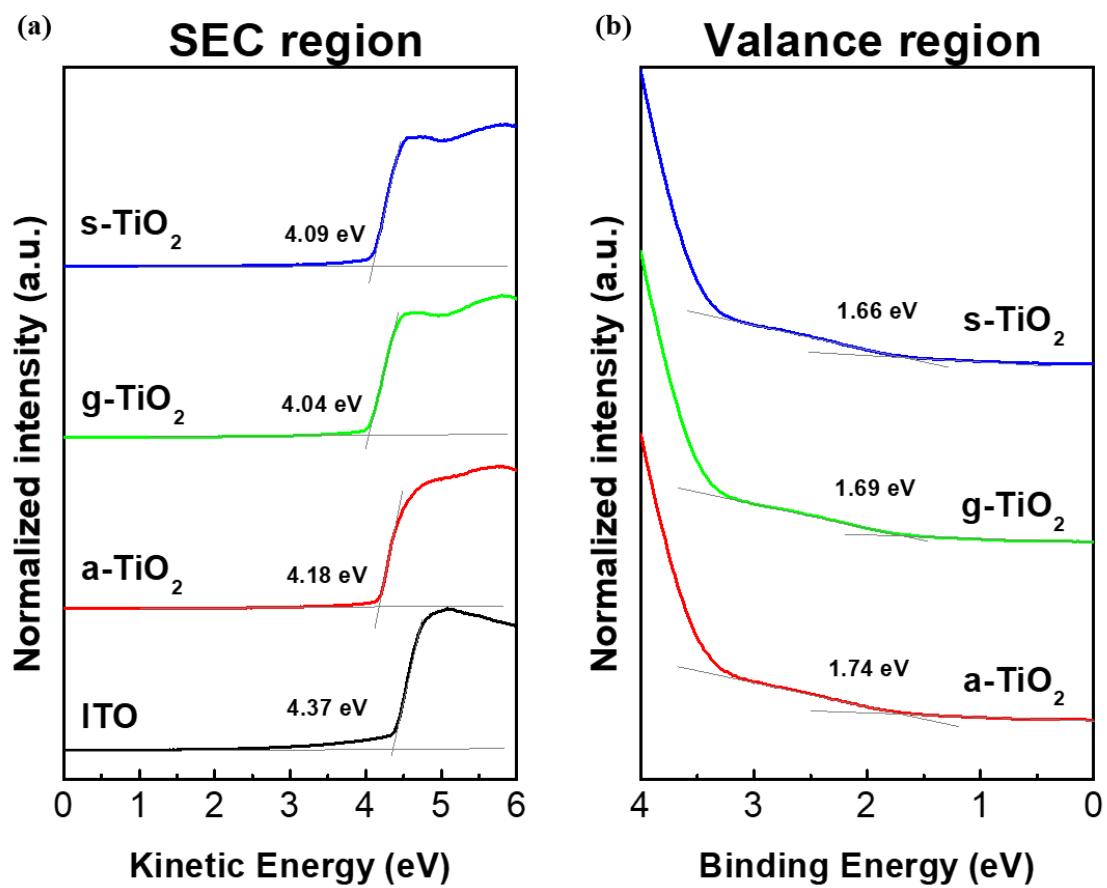

**Fig. S8** UPS spectra of ITO, a-TiO<sub>2</sub>, g-TiO<sub>2</sub> and s-TiO<sub>2</sub>. (b) Secondary electron cut-off region.

(c) Valance region.

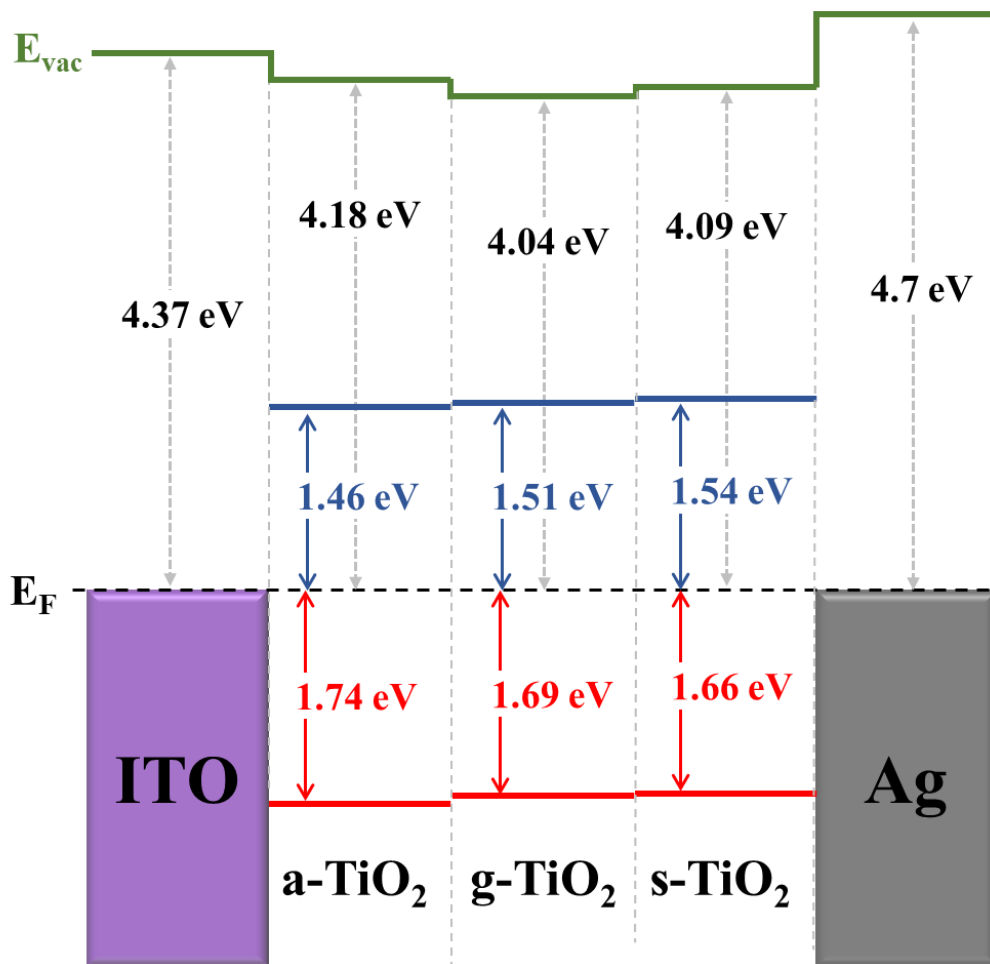

**Fig. S9** Schematic energy band diagram of Ag/TiO<sub>2</sub>/ITO memristors with aligned Fermi level.

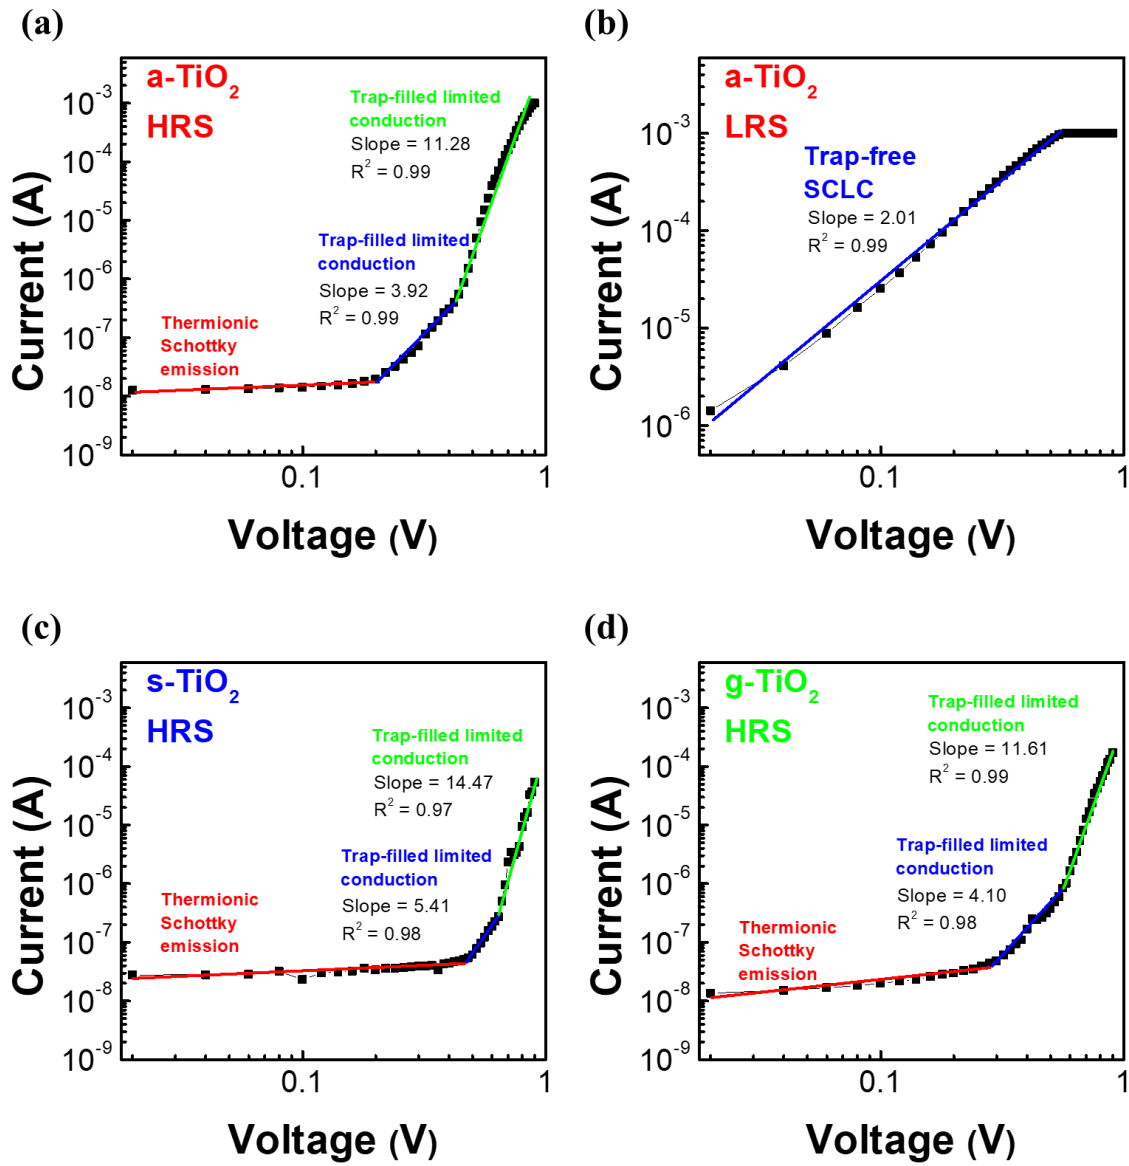

**Fig. S10** log(*I*)-log(*V*) curves of the a-TiO<sub>2</sub>, s-TiO<sub>2</sub> and g-TiO<sub>2</sub> to investigate the conduction mechanism.

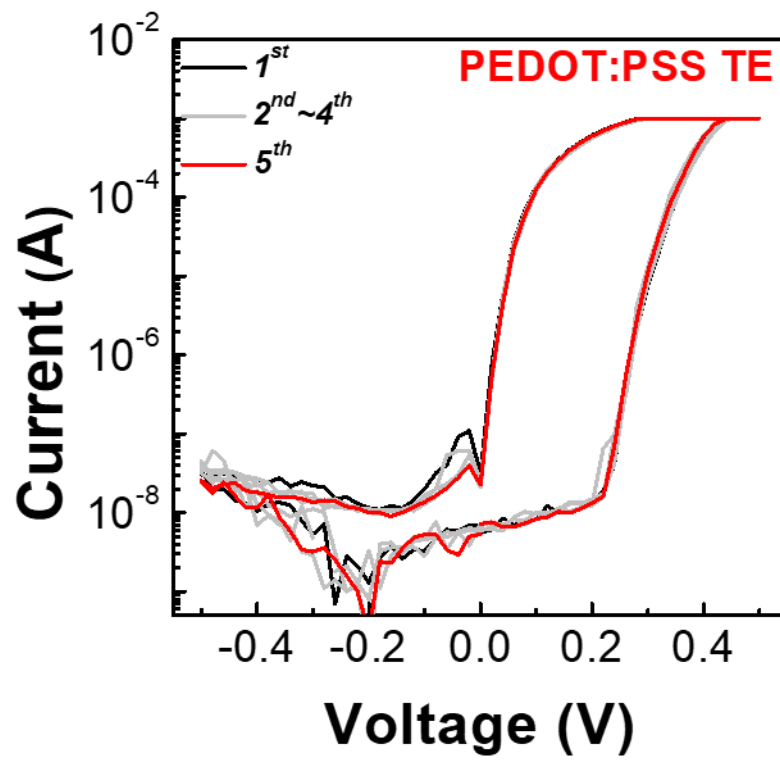

**Fig. S11**  $I$ - $V$  characteristics of a-TiO<sub>2</sub> based dot type memristor with PEDOT:PSS top electrode.

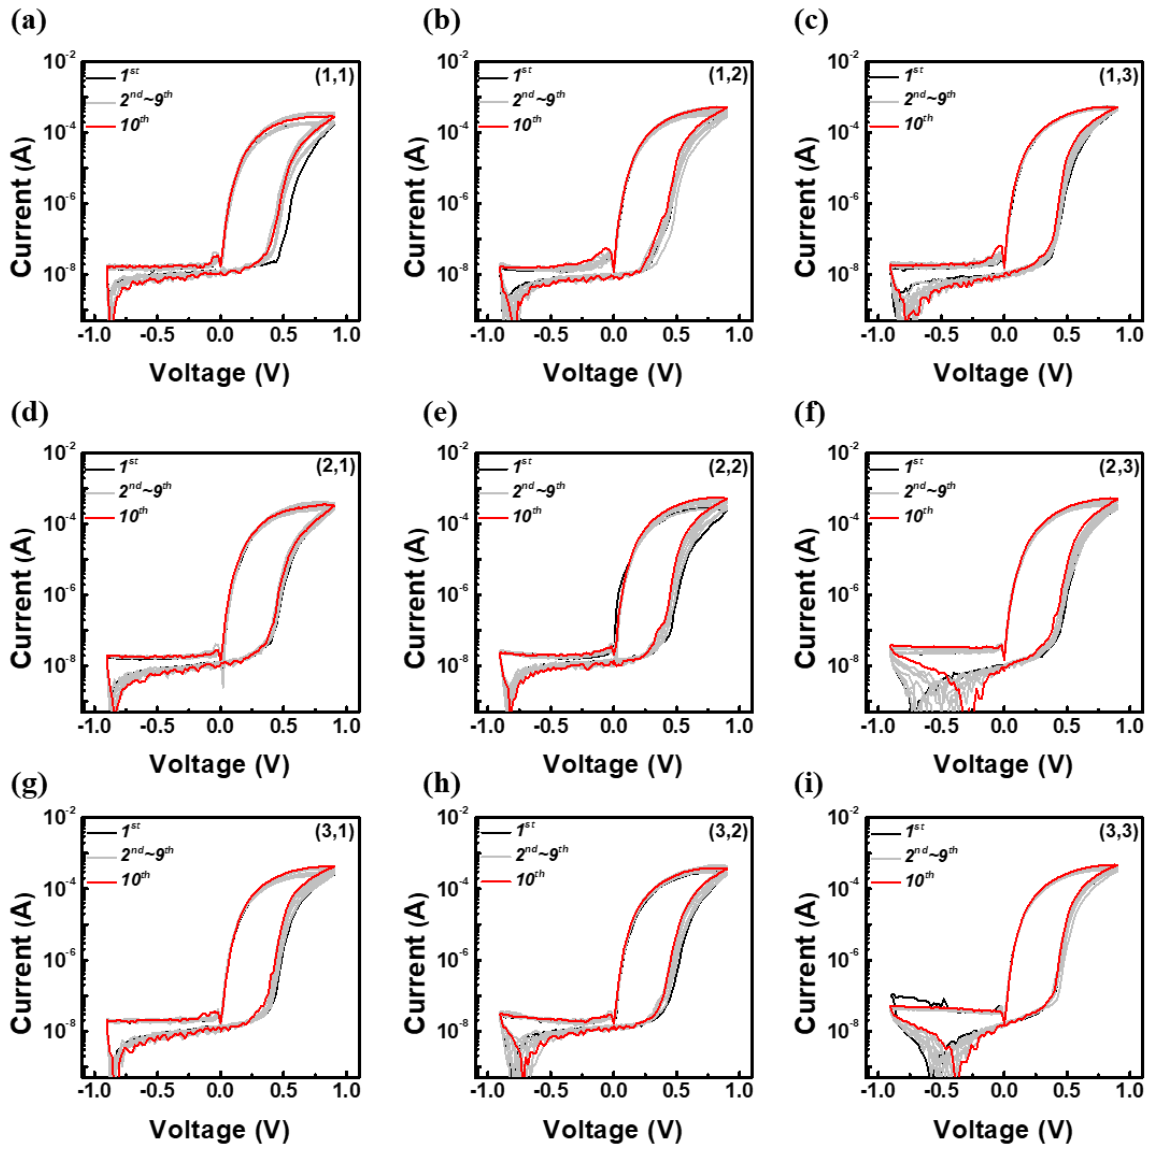

Fig. S12  $I$ - $V$  characteristics of a-TiO<sub>2</sub> based memristor in the  $3 \times 3$  crossbar array.

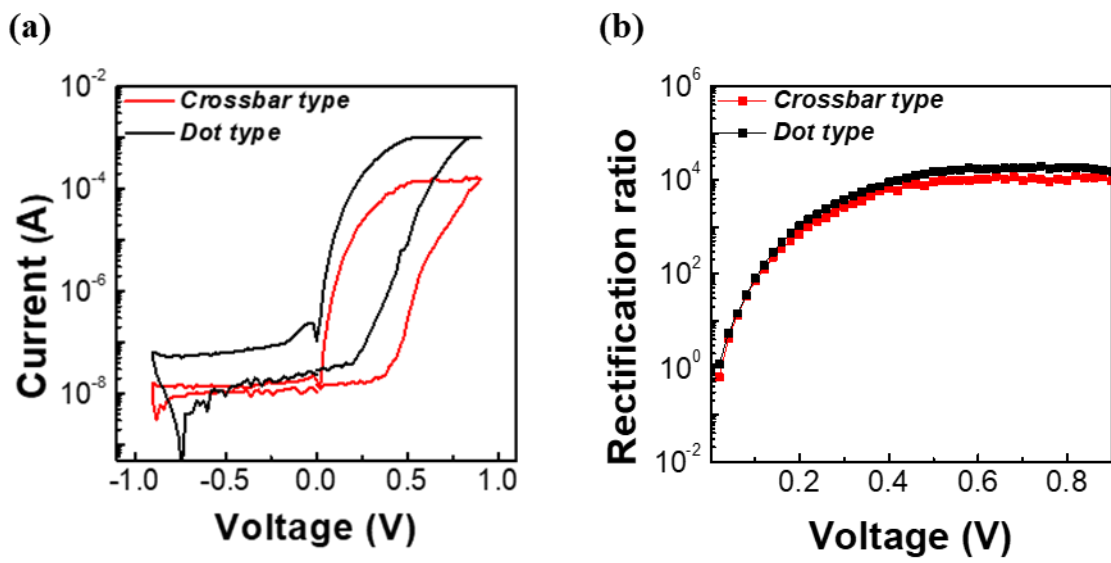

Fig. S13 (a)  $I-V$  curves, and (b) rectification ratio of dot type and crossbar type devices.

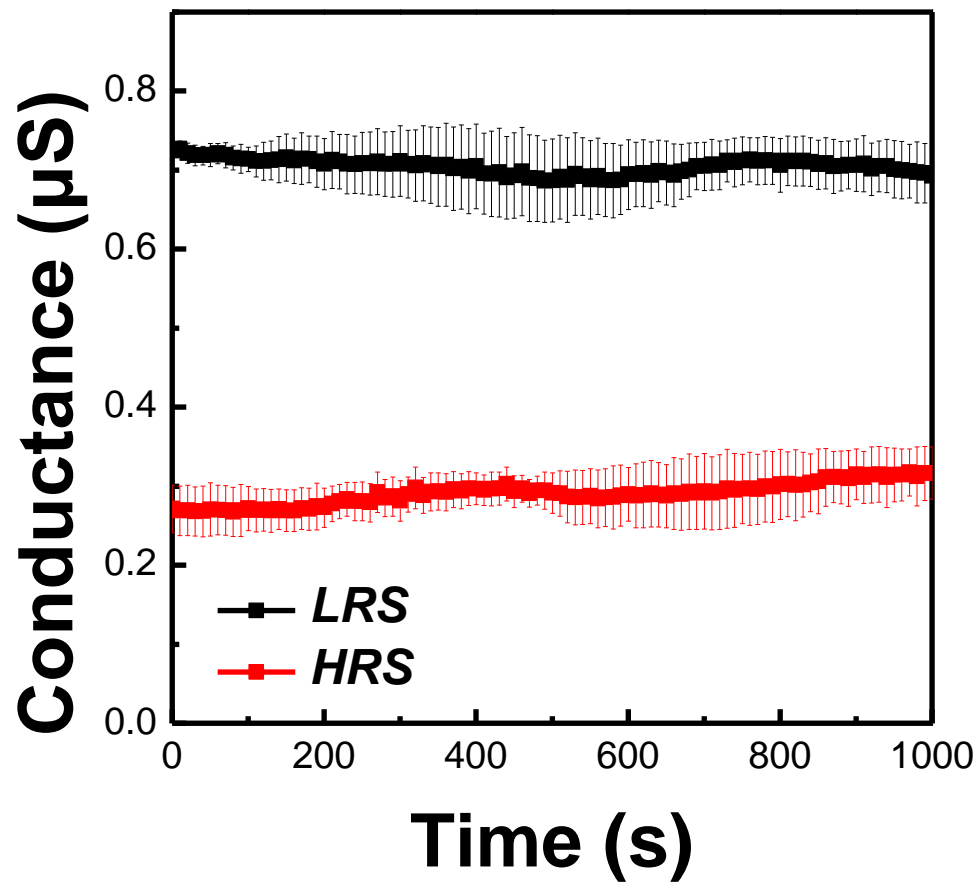

**Fig. S14** The data retention of HRS and LRS recorded for an a-TiO<sub>2</sub> based memristor in the 3 × 3 crossbar array, with error bars.

|           | Structure                                     | $V_{set}$ | Rectification | Rectification ratio   | On/off ratio          | Size                    | Crossbar | Type      | Ref |
|-----------|-----------------------------------------------|-----------|---------------|-----------------------|-----------------------|-------------------------|----------|-----------|-----|
| 1         | Pt/Ti/HfO <sub>x</sub> /TaO <sub>x</sub> /TiN | 4 V       | No            |                       | > 10                  | 4~100 $\mu\text{m}^2$   |          | Interface | 67  |
| 2         | Pt/NbO <sub>x</sub> /TiN                      | 1.5~2 V   | No            |                       | > 10 <sup>2</sup>     | 0.16~16 $\mu\text{m}^2$ |          | Filament  | 68  |
| 3         | Ag/CTS-MoO <sub>3</sub> /Mo                   | 1~2 V     | Restrictive   | > 4 × 10 <sup>3</sup> | > 4 × 10 <sup>3</sup> | NA                      |          | Filament  | 69  |
| 4         | Pt/HfO <sub>x</sub> /SiO <sub>x</sub> /TiN    | 3 V       | No            | NA                    | NA                    | NA                      |          | Filament  | 70  |
| 5         | Au/MAPb <sub>3</sub> /Au                      | 2 V       | No            |                       | > 10 <sup>8</sup>     | 2500 $\mu\text{m}^2$    | 8 × 8    | Filament  | 71  |
| 6         | Au/HfSe <sub>2</sub> /Ti                      | 0.74 V    | No            |                       | > 10 <sup>2</sup>     | 25 $\mu\text{m}^2$      | 3 × 3    | Filament  | 72  |
| 7         | Pt/TiO <sub>x</sub> /HfO <sub>2</sub> /Pt     | -5 V      | Yes           | > 10 <sup>3</sup>     | NA                    | 4 nm <sup>2</sup>       | 3 × 3    | Interface | 73  |
| 8         | Au/TiO <sub>2</sub> /Au                       | 3 V       | Restrictive   | NA                    | > 10 <sup>3</sup>     | 25~100 $\mu\text{m}^2$  | 32 × 32  | Interface | 74  |
| 9         | Ag/TiO <sub>2</sub> /FTO                      | 5 V       | No            |                       | > 10                  | 12.55 mm <sup>2</sup>   |          | Interface | 75  |
| 10        | Ag/TiO <sub>2</sub> /FTO                      | 2 V       | No            |                       | > 30                  | NA                      |          | Filament  | 76  |
| This work | Ag/TiO <sub>2</sub> /TiO <sub>x</sub> /ITO    | 0.9 V     | Yes           | > 10 <sup>4</sup>     | > 4 × 10 <sup>3</sup> | 0.1~1 mm <sup>2</sup>   | 3 × 3    | Interface |     |

**Table. S1** Comparative analysis of a-TiO<sub>2</sub> memristor performance relative to previous studies.
